# Supplementary material
Source: Springer Nature journal article supplement (https://www.springermedizin.de/resource/supplementary/12955_2013_1256_MOESM3_ESM.pdf/9559420)
Supplement: MOESM3 [file 9559420]

**Number of subjects approached**  
CC : 265    GOPC: 1464  
N= 1729

**Not eligible**  
CC : 81    GOPC: 1054  
N= 1135

**Eligible**  
CC : 184    GOPC: 410  
N= 594

**Refused**  
CC : 49    GOPC: 230  
N= 279

**Agreed to participate in the study**  
CC : 135    GOPC: 180  
N= 315

**Complete baseline telephone interview**  
CC : 100    GOPC:133  
N=233  
(Response Rate: 39%)

**Complete 2-week test – retest telephone interview**  
GOPC:100  
N= 100

CC: continence clinics  
GOPC: general outpatient clinics
